# Supplementary material
Source: HighWire-hosted journal article supplement (doi:10.1101/rna.031120.111)
Supplement: FosterREVTable_S4.docx [file FosterREVTable_S4.docx]

**Comprehensive Evaluation of Canonical vs. Dicer-Substrate siRNA *in vitro* and *in vivo***

**Table S4**

|  |  | **ED50** | | | **TI50** | | |
| --- | --- | --- | --- | --- | --- | --- | --- |
|  |  | **siRNA** |  | **DsiRNA** | **siRNA** |  | **DsiRNA** |
| FVII S14 | UU | 0.053 | < | 0.115 | 16.2 | > | 7.3 |
| HL | 0.144* | < | 1.426* | 14.2* | > | 0.0* |
| UA | 0.035 |  | 0.039* | 23.0* |  | 23.8* |
| FVII S52 | UU | 1.461 | > | 0.036 | 0.0 | < | 15.0 |
| HL | 0.126* |  | 0.196* | 10.0* |  | 8.0* |
| UA | 0.055* | < | 0.090* | 11.1* | < | 16.8* |
| FVII S41 | UU | 0.068 |  | 0.111 | 10.9 |  | 11.4 |
| PTEN S49 | UU | 0.044 |  | 0.036 | 8.2 |  | 9.7 |
| HL | 0.027* | < | 0.107* | 6.8 |  | 1.1* |
| HA | 0.012* | < | 0.070* | 14.2* | > | 2.2* |
| UA | 0.034 |  | 0.031 | 8.6* |  | 9.2 |
| PTEN S39 | UU | 0.033 | > | 0.012 | 9.9 | < | 13.8 |
| HL | 0.031 | < | 0.085* | 6.2* | > | 3.9* |
| HA | 0.013* | < | 0.019* | 16.4* | > | 11.7* |
| UA | 0.024 |  | 0.019 | 10.7* | > | 10.0* |
| PTEN S15 | UU | 0.033 | > | 0.016 | 10.7 |  | 10.3 |
