# Supplementary material
Source: HighWire-hosted journal article supplement (doi:10.1101/rna.031120.111)
Supplement: FosterREVTables_S1_S2.docx [file FosterREVTables_S1_S2.docx]

**Comprehensive Evaluation of Canonical vs. Dicer-Substrate siRNA *in vitro* and *in vivo***

**Table S1**

| FVII Canonical | | FVII Dicer-substrate | |
| --- | --- | --- | --- |
| ID | Sequence (S/AS) | ID | Sequence (S/AS) |
| FVIIC-S1UU | AGGCGUGCCAACUCACUCCUG | FVIID-S1UU | PAGGCGUGCCAACUCACUCCUGGAGG |
|  | UUUCCGCACGGUUGAGUGAGG |  | UUUCCGCACGGUUGAGUGAGGACCUCC |
| FVIIC-S2UU | CUCCCAGUACAUAGACUGGCU | FVIID-S2UU | PCUCCCAGUACAUAGACUGGCUGGUC |
|  | CAGAGGGUCAUGUAUCUGACC |  | CAGAGGGUCAUGUAUCUGACCGACCAG |
| FVIIC-S3UU | UCCUACACAGGCAAAGGCGUG | FVIID-S3UU | PUCCUACACAGGCAAAGGCGUGCCAA |
|  | ACAGGAUGUGUCCGUUUCCGC |  | ACAGGAUGUGUCCGUUUCCGCACGGUU |
| FVIIC-S4UU | CAGGCAAAGGCGUGCCAACUC | FVIID-S4UU | PCAGGCAAAGGCGUGCCAACUCACUC |
|  | GUGUCCGUUUCCGCACGGUUG |  | GUGUCCGUUUCCGCACGGUUGAGUGAG |
| FVIIC-S5UU | CAAAGGCGUGCCAACUCACUC | FVIID-S5UU | PCAAAGGCGUGCCAACUCACUCCUGG |
|  | CCGUUUCCGCACGGUUGAGUG |  | CCGUUUCCGCACGGUUGAGUGAGGACC |
| FVIIC-S6UU | GGCGUGCCAACUCACUCCUGG | FVIID-S6UU | PGGCGUGCCAACUCACUCCUGGAGGA |
|  | UUCCGCACGGUUGAGUGAGGA |  | UUCCGCACGGUUGAGUGAGGACCUCCU |
| FVIIC-S7UU | UGUACACCAGGGUCUCCCAGU | FVIID-S7UU | PUGUACACCAGGGUCUCCCAGUACAU |
|  | CCACAUGUGGUCCCAGAGGGU |  | CCACAUGUGGUCCCAGAGGGUCAUGUA |
| FVIIC-S8UU | UCCCAGUACAUAGACUGGCUG | FVIID-S8UU | PUCCCAGUACAUAGACUGGCUGGUCA |
|  | AGAGGGUCAUGUAUCUGACCG |  | AGAGGGUCAUGUAUCUGACCGACCAGU |
| FVIIC-S9UU | AGGGACCAAGCGUACCUGUAG | FVIID-S9UU | PAGGGACCAAGCGUACCUGUAGCUGU |
|  | CAUCCCUGGUUCGCAUGGACA |  | CAUCCCUGGUUCGCAUGGACAUCGACA |
| FVIIC-S10UU | GCAAAGGCGUGCCAACUCACU | FVIID-S10UU | PGCAAAGGCGUGCCAACUCACUCCUG |
|  | UCCGUUUCCGCACGGUUGAGU |  | UCCGUUUCCGCACGGUUGAGUGAGGAC |
| FVIIC-S11UU | AAAGGCGUGCCAACUCACUCC | FVIID-S11UU | PAAAGGCGUGCCAACUCACUCCUGGA |
|  | CGUUUCCGCACGGUUGAGUGA |  | CGUUUCCGCACGGUUGAGUGAGGACCU |
| FVIIC-S12UU | GGGGUGUACACCAGGGUCUCC | FVIID-S12UU | PGGGGUGUACACCAGGGUCUCCCAGU |
|  | AACCCCACAUGUGGUCCCAGA |  | AACCCCACAUGUGGUCCCAGAGGGUCA |
| FVIIC-S13UU | GCCAGAUGAGGUGUCCUGCAA | FVIID-S13UU | PGCCAGAUGAGGUGUCCUGCAAACCA |
|  | GUCGGUCUACUCCACAGGACG |  | GUCGGUCUACUCCACAGGACGUUUGGU |
| FVIIC-S14UU | AGAUGAGGUGUCCUGCAAACC | FVIID-S14UU | PAGAUGAGGUGUCCUGCAAACCAAAA |
|  | GGUCUACUCCACAGGACGUUU |  | GGUCUACUCCACAGGACGUUUGGUUUU |
| FVIIC-S15UU | AAACCAAAAGUUGAGUACCCG | FVIID-S15UU | PAAACCAAAAGUUGAGUACCCGUGUG |
|  | CGUUUGGUUUUCAACUCAUGG |  | CGUUUGGUUUUCAACUCAUGGGCACAC |
| FVIIC-S16UU | CUUCUCCGAGAACACCCUAGC | FVIID-S16UU | PCUUCUCCGAGAACACCCUAGCCAGA |
|  | AGGAAGAGGCUCUUGUGGGAU |  | AGGAAGAGGCUCUUGUGGGAUCGGUCU |
| FVIIC-S17UU | UCCGAGAACACCCUAGCCAGA | FVIID-S17UU | PUCCGAGAACACCCUAGCCAGAAUCC |
|  | AGAGGCUCUUGUGGGAUCGGU |  | AGAGGCUCUUGUGGGAUCGGUCUUAGG |
| FVIIC-S18UU | AACCAAAAGUUGAGUACCCGU | FVIID-S18UU | PAACCAAAAGUUGAGUACCCGUGUGG |
|  | GUUUGGUUUUCAACUCAUGGG |  | GUUUGGUUUUCAACUCAUGGGCACACC |
| FVIIC-S19UU | CAAACCAAAAGUUGAGUACCC | FVIID-S19UU | PCAAACCAAAAGUUGAGUACCCGUGU |
|  | ACGUUUGGUUUUCAACUCAUG |  | ACGUUUGGUUUUCAACUCAUGGGCACA |
| FVIIC-S20UU | GCUGAUCUGUGCAAAUGAAAA | FVIID-S20UU | PGCUGAUCUGUGCAAAUGAAAAUGGU |
|  | GUCGACUAGACACGUUUACUU |  | GUCGACUAGACACGUUUACUUUUACCA |
| FVIIC-S21UU | CCUACACAGGCAAAGGCGUGC | FVIID-S21UU | PCCUACACAGGCAAAGGCGUGCCAAC |
|  | CAGGAUGUGUCCGUUUCCGCA |  | CAGGAUGUGUCCGUUUCCGCACGGUUG |
| FVIIC-S22UU | UCGAAUCCAUGUCAGAACGUA | FVIID-S22UU | PUCGAAUCCAUGUCAGAACGUAGGUA |
|  | GGAGCUUAGGUACAGUCUUGC |  | GGAGCUUAGGUACAGUCUUGCAUCCAU |
| FVIIC-S23UU | ACCAAGCGUACCUGUAGCUGU | FVIID-S23UU | PACCAAGCGUACCUGUAGCUGUCAUG |
|  | CCUGGUUCGCAUGGACAUCGA |  | CCUGGUUCGCAUGGACAUCGACAGUAC |
| FVIIC-S24UU | CCAAGCGUACCUGUAGCUGUC | FVIID-S24UU | PCCAAGCGUACCUGUAGCUGUCAUGA |
|  | CUGGUUCGCAUGGACAUCGAC |  | CUGGUUCGCAUGGACAUCGACAGUACU |
| FVIIC-S25UU | UGUCCUGCAAACCAAAAGUUG | FVIID-S25UU | PUGUCCUGCAAACCAAAAGUUGAGUA |
|  | CCACAGGACGUUUGGUUUUCA |  | CCACAGGACGUUUGGUUUUCAACUCAU |
| FVIIC-S26UU | CUCCGAGAACACCCUAGCCAG | FVIID-S26UU | PCUCCGAGAACACCCUAGCCAGAAUC |
|  | AAGAGGCUCUUGUGGGAUCGG |  | AAGAGGCUCUUGUGGGAUCGGUCUUAG |
| FVIIC-S27UU | AGCAGCUGAUCUGUGCAAAUG | FVIID-S27UU | PAGCAGCUGAUCUGUGCAAAUGAAAA |
|  | ACUCGUCGACUAGACACGUUU |  | GUGGUAAAAGUAAACGUGUCUAGUCP |
| FVIIC-S28UU | UGUGACCAGUACUGCAGGGAC | FVIID-S28UU | PUGUGACCAGUACUGCAGGGACCAUG |
|  | UGACACUGGUCAUGACGUCCC |  | UGACACUGGUCAUGACGUCCCUGGUAC |
| FVIIC-S29UU | AAGCGUACCUGUAGCUGUCAU | FVIID-S29UU | PAAGCGUACCUGUAGCUGUCAUGAGG |
|  | GGUUCGCAUGGACAUCGACAG |  | GGUUCGCAUGGACAUCGACAGUACUCC |
| FVIIC-S30UU | UUUUCAUAACCCAGGAGGAAG | FVIID-S30UU | PUUUUCAUAACCCAGGAGGAAGCACA |
|  | UCAAAAGUAUUGGGUCCUCCU |  | UCAAAAGUAUUGGGUCCUCCUUCGUGU |
| FVIIC-S31UU | CCGAGAACACCCUAGCCAGAA | FVIID-S31UU | PCCGAGAACACCCUAGCCAGAAUCCG |
|  | GAGGCUCUUGUGGGAUCGGUC |  | GAGGCUCUUGUGGGAUCGGUCUUAGGC |
| FVIIC-S32UU | CUGGACCGUGGUGCCACAGCC | FVIID-S32UU | PCUGGACCGUGGUGCCACAGCCCUGG |
|  | AUGACCUGGCACCACGGUGUC |  | AUGACCUGGCACCACGGUGUCGGGACC |
| FVIIC-S33UU | CCCAGUACAUAGACUGGCUGG | FVIID-S33UU | PCCCAGUACAUAGACUGGCUGGUCAG |
|  | GAGGGUCAUGUAUCUGACCGA |  | GAGGGUCAUGUAUCUGACCGACCAGUC |
| FVIIC-S34UU | AUGAGGUGUCCUGCAAACCAA | FVIID-S34UU | PAUGAGGUGUCCUGCAAACCAAAAGU |
|  | UCUACUCCACAGGACGUUUGG |  | UCUACUCCACAGGACGUUUGGUUUUCA |
| FVIIC-S35UU | GGACCAAGCGUACCUGUAGCU | FVIID-S35UU | PGGACCAAGCGUACCUGUAGCUGUCA |
|  | UCCCUGGUUCGCAUGGACAUC |  | UCCCUGGUUCGCAUGGACAUCGACAGU |
| FVIIC-S36UU | GUCCUACACAGGCAAAGGCGU | FVIID-S36UU | PGUCCUACACAGGCAAAGGCGUGCCA |
|  | CACAGGAUGUGUCCGUUUCCG |  | CACAGGAUGUGUCCGUUUCCGCACGGU |
| FVIIC-S37UU | UACACAGGCAAAGGCGUGCCA | FVIID-S37UU | PUACACAGGCAAAGGCGUGCCAACUC |
|  | GGAUGUGUCCGUUUCCGCACG |  | GGAUGUGUCCGUUUCCGCACGGUUGAG |
| FVIIC-S38UU | CACAGGCAAAGGCGUGCCAAC | FVIID-S38UU | PCACAGGCAAAGGCGUGCCAACUCAC |
|  | AUGUGUCCGUUUCCGCACGGU |  | AUGUGUCCGUUUCCGCACGGUUGAGUG |
| FVIIC-S39UU | ACAGGCAAAGGCGUGCCAACU | FVIID-S39UU | PACAGGCAAAGGCGUGCCAACUCACU |
|  | UGUGUCCGUUUCCGCACGGUU |  | UGUGUCCGUUUCCGCACGGUUGAGUGA |
| FVIIC-S40UU | GACCAGUGUGCCUCGAAUCCA | FVIID-S40UU | PGACCAGUGUGCCUCGAAUCCAUGUC |
|  | CCCUGGUCACACGGAGCUUAG |  | CCCUGGUCACACGGAGCUUAGGUACAG |
| FVIIC-S41UU | CAAGCGUACCUGUAGCUGUCA | FVIID-S41UU | PCAAGCGUACCUGUAGCUGUCAUGAG |
|  | UGGUUCGCAUGGACAUCGACA |  | UGGUUCGCAUGGACAUCGACAGUACUC |
| FVIIC-S42UU | UCCUGCAAACCAAAAGUUGAG | FVIID-S42UU | PUCCUGCAAACCAAAAGUUGAGUACC |
|  | ACAGGACGUUUGGUUUUCAAC |  | ACAGGACGUUUGGUUUUCAACUCAUGG |
| FVIIC-S43UU | GCAAACCAAAAGUUGAGUACC | FVIID-S43UU | PGCAAACCAAAAGUUGAGUACCCGUG |
|  | GACGUUUGGUUUUCAACUCAU |  | GACGUUUGGUUUUCAACUCAUGGGCAC |
| FVIIC-S44UU | GAGGUGCCCCGGCUGAUGACC | FVIID-S44UU | PGAGGUGCCCCGGCUGAUGACCCAGG |
|  | AGCUCCACGGGGCCGACUACU |  | AGCUCCACGGGGCCGACUACUGGGUCC |
| FVIIC-S45UU | ACACAGGCAAAGGCGUGCCAA | FVIID-S45UU | PACACAGGCAAAGGCGUGCCAACUCA |
|  | GAUGUGUCCGUUUCCGCACGG |  | GAUGUGUCCGUUUCCGCACGGUUGAGU |
| FVIIC-S46UU | GGUAUCUGACAGGUGUGGUCA | FVIID-S46UU | PGGUAUCUGACAGGUGUGGUCAGCUG |
|  | UACCAUAGACUGUCCACACCA |  | UACCAUAGACUGUCCACACCAGUCGAC |
| FVIIC-S47UU | GUCAGCUGGGGGGAGGGCUGU | FVIID-S47UU | PGUCAGCUGGGGGGAGGGCUGUGCAG |
|  | ACCAGUCGACCCCCCUCCCGA |  | ACCAGUCGACCCCCCUCCCGACACGUC |
| FVIIC-S48UU | CCAGUACAUAGACUGGCUGGU | FVIID-S48UU | PCCAGUACAUAGACUGGCUGGUCAGA |
|  | AGGGUCAUGUAUCUGACCGAC |  | AGGGUCAUGUAUCUGACCGACCAGUCU |
| FVIIC-S49UU | AGUACAUAGACUGGCUGGUCA | FVIID-S49UU | PAGUACAUAGACUGGCUGGUCAGACA |
|  | GGUCAUGUAUCUGACCGACCA |  | GGUCAUGUAUCUGACCGACCAGUCUGU |
| FVIIC-S50UU | UACAUAGACUGGCUGGUCAGA | FVIID-S50UU | PUACAUAGACUGGCUGGUCAGACACA |
|  | UCAUGUAUCUGACCGACCAGU |  | UCAUGUAUCUGACCGACCAGUCUGUGU |
| FVIIC-S51UU | UCUUCAAGAGCCCUGAGAGGA | FVIID-S51UU | PUCUUCAAGAGCCCUGAGAGGACCAA |
|  | CUAGAAGUUCUCGGGACUCUC |  | CUAGAAGUUCUCGGGACUCUCCUGGUU |
| FVIIC-S52UU | UGCCUCGAAUCCAUGUCAGAA | FVIID-S52UU | PUGCCUCGAAUCCAUGUCAGAACGUA |
|  | ACACGGAGCUUAGGUACAGUC |  | ACACGGAGCUUAGGUACAGUCUUGCAU |
| FVIIC-S53UU | GCCUCGAAUCCAUGUCAGAAC | FVIID-S53UU | PGCCUCGAAUCCAUGUCAGAACGUAG |
|  | CACGGAGCUUAGGUACAGUCU |  | CACGGAGCUUAGGUACAGUCUUGCAUC |
| FVIIC-S54UU | UACUGGACCGUGGUGCCACAG | FVIID-S54UU | PUACUGGACCGUGGUGCCACAGCCCU |
|  | CGAUGACCUGGCACCACGGUG |  | CGAUGACCUGGCACCACGGUGUCGGGA |
| FVIIC-S55UU | GGUGUCCUACACAGGCAAAGG | FVIID-S55UU | PGGUGUCCUACACAGGCAAAGGCGUG |
|  | UACCACAGGAUGUGUCCGUUU |  | UACCACAGGAUGUGUCCGUUUCCGCAC |
| FVIIC-S56UU | GUGUCCUACACAGGCAAAGGC | FVIID-S56UU | PGUGUCCUACACAGGCAAAGGCGUGC |
|  | ACCACAGGAUGUGUCCGUUUC |  | ACCACAGGAUGUGUCCGUUUCCGCACG |
| FVIIC-S57UU | UGUCCUACACAGGCAAAGGCG | FVIID-S57UU | PUGUCCUACACAGGCAAAGGCGUGCC |
|  | CCACAGGAUGUGUCCGUUUCC |  | CCACAGGAUGUGUCCGUUUCCGCACGG |
| FVIIC-S58UU | CAUCGAGGUGCCCCGGCUGAU | FVIID-S58UU | PCAUCGAGGUGCCCCGGCUGAUGACC |
|  | AGGUAGCUCCACGGGGCCGAC |  | AGGUAGCUCCACGGGGCCGACUACUGG |
| FVIIC-S59UU | CGAGGUGCCCCGGCUGAUGAC | FVIID-S59UU | PCGAGGUGCCCCGGCUGAUGACCCAG |
|  | UAGCUCCACGGGGCCGACUAC |  | UAGCUCCACGGGGCCGACUACUGGGUC |
| FVIIC-S60UU | AGGUGCCCCGGCUGAUGACCC | FVIID-S60UU | PAGGUGCCCCGGCUGAUGACCCAGGA |
|  | GCUCCACGGGGCCGACUACUG |  | GCUCCACGGGGCCGACUACUGGGUCCU |
| FVIIC-S61UU | GGUGCCCCGGCUGAUGACCCA | FVIID-S61UU | PGGUGCCCCGGCUGAUGACCCAGGAC |
|  | CUCCACGGGGCCGACUACUGG |  | CUCCACGGGGCCGACUACUGGGUCCUG |
| FVIIC-S62UU | GGCUGAUGACCCAGGACUGUC | FVIID-S62UU | PGGCUGAUGACCCAGGACUGUCUGGA |
|  | GGCCGACUACUGGGUCCUGAC |  | GGCCGACUACUGGGUCCUGACAGACCU |
| FVIIC-S63UU | AAGGACGCCUGCAAGGGUGAC | FVIID-S63UU | PAAGGACGCCUGCAAGGGUGACAGCG |
|  | GGUUCCUGCGGACGUUCCCAC |  | GGUUCCUGCGGACGUUCCCACUGUCGC |
| FVIIC-S64UU | AAGGCGUGCCAACUCACUCCU | FVIID-S64UU | PAAGGCGUGCCAACUCACUCCUGGAG |
|  | GUUUCCGCACGGUUGAGUGAG |  | GUUUCCGCACGGUUGAGUGAGGACCUC |
| FVIIC-S65UU | GUAUCUGACAGGUGUGGUCAG | FVIID-S65UU | PGUAUCUGACAGGUGUGGUCAGCUGG |
|  | ACCAUAGACUGUCCACACCAG |  | ACCAUAGACUGUCCACACCAGUCGACC |
| FVIIC-S66UU | UGACAGGUGUGGUCAGCUGGG | FVIID-S66UU | PUGACAGGUGUGGUCAGCUGGGGGGA |
|  | AGACUGUCCACACCAGUCGAC |  | AGACUGUCCACACCAGUCGACCCCCCU |
| FVIIC-S67UU | GGAUCAUCUCAAGUCUUACGU | FVIID-S67UU | PGGAUCAUCUCAAGUCUUACGUCUGC |
|  | GUCCUAGUAGAGUUCAGAAUG |  | GUCCUAGUAGAGUUCAGAAUGCAGACG |

**Table S2**

| PTEN Canonical | | PTEN Dicer-substrate | |
| --- | --- | --- | --- |
| ID | Sequence (S/AS) | ID | Sequence (S/AS) |
| PTENC-S1UU | AUCAAGAGGAUGGAUUCGACU | PTEND-S1UU | PAUCAAGAGGAUGGAUUCGACUUAGA |
|  | UAUAGUUCUCCUACCUAAGCU |  | UAUAGUUCUCCUACCUAAGCUGAAUCU |
| PTENC-S2UU | AUUAUGACACCGCCAAAUUUA | PTEND-S2UU | PAUUAUGACACCGCCAAAUUUAAUUG |
|  | UGUAAUACUGUGGCGGUUUAA |  | UGUAAUACUGUGGCGGUUUAAAUUAAC |
| PTENC-S3UU | UCCCAGUCAGAGGCGCUAUGU | PTEND-S3UU | PUCCCAGUCAGAGGCGCUAUGUGUAU |
|  | UAAGGGUCAGUCUCCGCGAUA |  | UAAGGGUCAGUCUCCGCGAUACACAUA |
| PTENC-S4UU | UAUGGGGAAGUAAGGACCAGA | PTEND-S4UU | PUAUGGGGAAGUAAGGACCAGAGACA |
|  | AGAUACCCCUUCAUUCCUGGU |  | AGAUACCCCUUCAUUCCUGGUCUCUGU |
| PTENC-S5UU | AGGAUGGAUUCGACUUAGACU | PTEND-S5UU | PAGGAUGGAUUCGACUUAGACUUGAC |
|  | UCUCCUACCUAAGCUGAAUCU |  | UCUCCUACCUAAGCUGAAUCUGAACUG |
| PTENC-S6UU | AUCUUGACCAAUGGCUAAGUG | PTEND-S6UU | PAUCUUGACCAAUGGCUAAGUGAAGA |
|  | UCUAGAACUGGUUACCGAUUC |  | UCUAGAACUGGUUACCGAUUCACUUCU |
| PTENC-S7UU | UUCGACUUAGACUUGACCUAU | PTEND-S7UU | PUUCGACUUAGACUUGACCUAUAUUU |
|  | CUAAGCUGAAUCUGAACUGGA |  | CUAAGCUGAAUCUGAACUGGAUAUAAA |
| PTENC-S8UU | CCAAUGUUCAGUGGCGGAACU | PTEND-S8UU | PCCAAUGUUCAGUGGCGGAACUUGCA |
|  | AAGGUUACAAGUCACCGCCUU |  | AAGGUUACAAGUCACCGCCUUGAACGU |
| PTENC-S9UU | CAAGAGGAUGGAUUCGACUUA | PTEND-S9UU | PCAAGAGGAUGGAUUCGACUUAGACU |
|  | UAGUUCUCCUACCUAAGCUGA |  | UAGUUCUCCUACCUAAGCUGAAUCUGA |
| PTENC-S10UU | AUGGAUUCGACUUAGACUUGA | PTEND-S10UU | PAUGGAUUCGACUUAGACUUGACCUA |
|  | CCUACCUAAGCUGAAUCUGAA |  | CCUACCUAAGCUGAAUCUGAACUGGAU |
| PTENC-S11UU | UGACCAAUGGCUAAGUGAAGA | PTEND-S11UU | PUGACCAAUGGCUAAGUGAAGAUGAC |
|  | GAACUGGUUACCGAUUCACUU |  | GAACUGGUUACCGAUUCACUUCUACUG |
| PTENC-S12UU | UUGACCAAUGGCUAAGUGAAG | PTEND-S12UU | PUUGACCAAUGGCUAAGUGAAGAUGA |
|  | AGAACUGGUUACCGAUUCACU |  | AGAACUGGUUACCGAUUCACUUCUACU |
| PTENC-S13UU | AAGAGGAUGGAUUCGACUUAG | PTEND-S13UU | PAAGAGGAUGGAUUCGACUUAGACUU |
|  | AGUUCUCCUACCUAAGCUGAA |  | AGUUCUCCUACCUAAGCUGAAUCUGAA |
| PTENC-S14UU | AAACUAUUCCAAUGUUCAGUG | PTEND-S14UU | PAAACUAUUCCAAUGUUCAGUGGCGG |
|  | ACUUUGAUAAGGUUACAAGUC |  | ACUUUGAUAAGGUUACAAGUCACCGCC |
| PTENC-S15UU | UCGACUUAGACUUGACCUAUA | PTEND-S15UU | PUCGACUUAGACUUGACCUAUAUUUA |
|  | UAAGCUGAAUCUGAACUGGAU |  | UAAGCUGAAUCUGAACUGGAUAUAAAU |
| PTENC-S16UU | CCUUUUGAAGACCAUAACCCA | PTEND-S16UU | PCCUUUUGAAGACCAUAACCCACCAC |
|  | UAGGAAAACUUCUGGUAUUGG |  | UAGGAAAACUUCUGGUAUUGGGUGGUG |
| PTENC-S17UU | UGUGGUCUGCCAGCUAAAGGU | PTEND-S17UU | PUGUGGUCUGCCAGCUAAAGGUGAAG |
|  | AAACACCAGACGGUCGAUUUC |  | AAACACCAGACGGUCGAUUUCCACUUC |
| PTENC-S18UU | CUUGACCAAUGGCUAAGUGAA | PTEND-S18UU | PCUUGACCAAUGGCUAAGUGAAGAUG |
|  | UAGAACUGGUUACCGAUUCAC |  | UAGAACUGGUUACCGAUUCACUUCUAC |
| PTENC-S19UU | UUGUGGUCUGCCAGCUAAAGG | PTEND-S19UU | PUUGUGGUCUGCCAGCUAAAGGUGAA |
|  | CAAACACCAGACGGUCGAUUU |  | CAAACACCAGACGGUCGAUUUCCACUU |
| PTENC-S20UU | CUUUUGAAGACCAUAACCCAC | PTEND-S20UU | PCUUUUGAAGACCAUAACCCACCACA |
|  | AGGAAAACUUCUGGUAUUGGG |  | AGGAAAACUUCUGGUAUUGGGUGGUGU |
| PTENC-S21UU | AAACAAAAGGAGAUAUCAAGA | PTEND-S21UU | PAAACAAAAGGAGAUAUCAAGAGGAU |
|  | UCUUUGUUUUCCUCUAUAGUU |  | UCUUUGUUUUCCUCUAUAGUUCUCCUA |
| PTENC-S22UU | CAAUCAUGUUGCAGCAAUUCA | PTEND-S22UU | PCAAUCAUGUUGCAGCAAUUCACUGU |
|  | CUGUUAGUACAACGUCGUUAA |  | CUGUUAGUACAACGUCGUUAAGUGACA |
| PTENC-S23UU | UGAUCAUUAUAGAUAUUCUGA | PTEND-S23UU | PUGAUCAUUAUAGAUAUUCUGACACC |
|  | GGACUAGUAAUAUCUAUAAGA |  | GGACUAGUAAUAUCUAUAAGACUGUGG |
| PTENC-S24UU | CAAUAUUGAUGAUGUAGUAAG | PTEND-S24UU | PCAAUAUUGAUGAUGUAGUAAGGUUU |
|  | UUGUUAUAACUACUACAUCAU |  | UUGUUAUAACUACUACAUCAUUCCAAA |
| PTENC-S25UU | GAGGAUGGAUUCGACUUAGAC | PTEND-S25UU | PGAGGAUGGAUUCGACUUAGACUUGA |
|  | UUCUCCUACCUAAGCUGAAUC |  | UUCUCCUACCUAAGCUGAAUCUGAACU |
| PTENC-S26UU | GUUAGUGACAAUGAACCUGAU | PTEND-S26UU | PGUUAGUGACAAUGAACCUGAUCAUU |
|  | UACAAUCACUGUUACUUGGAC |  | UACAAUCACUGUUACUUGGACUAGUAA |
| PTENC-S27UU | UCCAAUGUUCAGUGGCGGAAC | PTEND-S27UU | PUCCAAUGUUCAGUGGCGGAACUUGC |
|  | UAAGGUUACAAGUCACCGCCU |  | UAAGGUUACAAGUCACCGCCUUGAACG |
| PTENC-S28UU | ACUUAGACUUGACCUAUAUUU | PTEND-S28UU | PACUUAGACUUGACCUAUAUUUAUCC |
|  | GCUGAAUCUGAACUGGAUAUA |  | GCUGAAUCUGAACUGGAUAUAAAUAGG |
| PTENC-S29UU | UUCCAAUGUUCAGUGGCGGAA | PTEND-S29UU | PUUCCAAUGUUCAGUGGCGGAACUUG |
|  | AUAAGGUUACAAGUCACCGCC |  | AUAAGGUUACAAGUCACCGCCUUGAAC |
| PTENC-S30UU | UUGAUGAUGUAGUAAGGUUUU | PTEND-S30UU | PUUGAUGAUGUAGUAAGGUUUUUGGA |
|  | AUAACUACUACAUCAUUCCAA |  | AUAACUACUACAUCAUUCCAAAAACCU |
| PTENC-S31UU | UGGAUUCGACUUAGACUUGAC | PTEND-S31UU | PUGGAUUCGACUUAGACUUGACCUAU |
|  | CUACCUAAGCUGAAUCUGAAC |  | CUACCUAAGCUGAAUCUGAACUGGAUA |
| PTENC-S32UU | GAGAUCGUUAGCAGAAACAAA | PTEND-S32UU | PGAGAUCGUUAGCAGAAACAAAAGGA |
|  | UUCUCUAGCAAUCGUCUUUGU |  | UUCUCUAGCAAUCGUCUUUGUUUUCCU |
| PTENC-S33UU | GCUAGAACUUAUCAAACCCUU | PTEND-S33UU | PGCUAGAACUUAUCAAACCCUUUUGU |
|  | GUCGAUCUUGAAUAGUUUGGG |  | GUCGAUCUUGAAUAGUUUGGGAAAACA |
| PTENC-S34UU | AUUCUGACACCACUGACUCUG | PTEND-S34UU | PAUUCUGACACCACUGACUCUGAUCC |
|  | UAUAAGACUGUGGUGACUGAG |  | UAUAAGACUGUGGUGACUGAGACUAGG |
| PTENC-S35UU | CAGAGAAUGAACCUUUUGAUG | PTEND-S35UU | PCAGAGAAUGAACCUUUUGAUGAAGA |
|  | AGGUCUCUUACUUGGAAAACU |  | AGGUCUCUUACUUGGAAAACUACUUCU |
| PTENC-S36UU | GAAACUAUUCCAAUGUUCAGU | PTEND-S36UU | PGAAACUAUUCCAAUGUUCAGUGGCG |
|  | AACUUUGAUAAGGUUACAAGU |  | AACUUUGAUAAGGUUACAAGUCACCGC |
| PTENC-S37UU | AGACAUUAUGACACCGCCAAA | PTEND-S37UU | PAGACAUUAUGACACCGCCAAAUUUA |
|  | UUUCUGUAAUACUGUGGCGGU |  | UUUCUGUAAUACUGUGGCGGUUUAAAU |
| PTENC-S38UU | CCAUUACAAGAUAUACAAUCU | PTEND-S38UU | PCCAUUACAAGAUAUACAAUCUUUGU |
|  | UUGGUAAUGUUCUAUAUGUUA |  | UUGGUAAUGUUCUAUAUGUUAGAAACA |
| PTENC-S39UU | CGACUUAGACUUGACCUAUAU | PTEND-S39UU | PCGACUUAGACUUGACCUAUAUUUAU |
|  | AAGCUGAAUCUGAACUGGAUA |  | AAGCUGAAUCUGAACUGGAUAUAAAUA |
| PTENC-S40UU | AUGUACUUUGAGUUCCCUCAG | PTEND-S40UU | PAUGUACUUUGAGUUCCCUCAGCCGU |
|  | AGUACAUGAAACUCAAGGGAG |  | AGUACAUGAAACUCAAGGGAGUCGGCA |
| PTENC-S41UU | UUGAAGACCAUAACCCACCAC | PTEND-S41UU | PUUGAAGACCAUAACCCACCACAGCU |
|  | AAAACUUCUGGUAUUGGGUGG |  | AAAACUUCUGGUAUUGGGUGGUGUCGA |
| PTENC-S42UU | ACCACAGCUAGAACUUAUCAA | PTEND-S42UU | PACCACAGCUAGAACUUAUCAAACCC |
|  | GGUGGUGUCGAUCUUGAAUAG |  | GGUGGUGUCGAUCUUGAAUAGUUUGGG |
| PTENC-S43UU | AACUAUUCCAAUGUUCAGUGG | PTEND-S43UU | PAACUAUUCCAAUGUUCAGUGGCGGA |
|  | CUUUGAUAAGGUUACAAGUCA |  | CUUUGAUAAGGUUACAAGUCACCGCCU |
| PTENC-S44UU | CUAUUCCAAUGUUCAGUGGCG | PTEND-S44UU | PCUAUUCCAAUGUUCAGUGGCGGAAC |
|  | UUGAUAAGGUUACAAGUCACC |  | UUGAUAAGGUUACAAGUCACCGCCUUG |
| PTENC-S45UU | AUUCGACUUAGACUUGACCUA | PTEND-S45UU | PAUUCGACUUAGACUUGACCUAUAUU |
|  | CCUAAGCUGAAUCUGAACUGG |  | CCUAAGCUGAAUCUGAACUGGAUAUAA |
| PTENC-S46UU | GACAUUAUGACACCGCCAAAU | PTEND-S46UU | PGACAUUAUGACACCGCCAAAUUUAA |
|  | UUCUGUAAUACUGUGGCGGUU |  | UUCUGUAAUACUGUGGCGGUUUAAAUU |
| PTENC-S47UU | ACAAUAUUGAUGAUGUAGUAA | PTEND-S47UU | PACAAUAUUGAUGAUGUAGUAAGGUU |
|  | CUUGUUAUAACUACUACAUCA |  | CUUGUUAUAACUACUACAUCAUUCCAA |
| PTENC-S48UU | UUCUGACACCACUGACUCUGA | PTEND-S48UU | PUUCUGACACCACUGACUCUGAUCCA |
|  | AUAAGACUGUGGUGACUGAGA |  | AUAAGACUGUGGUGACUGAGACUAGGU |
| PTENC-S49UU | GAUGAUGUUUGAAACUAUUCC | PTEND-S49UU | PGAUGAUGUUUGAAACUAUUCCAATG |
|  | UUCUACUACAAACUUUGAUAA |  | UUCUACUACAAACUUUGAUAAGGUUAC |
| PTENC-S50UU | AGGAGAUAUCAAGAGGAUGGA | PTEND-S50UU | PAGGAGAUAUCAAGAGGAUGGAUUCG |
|  | UUUCCUCUAUAGUUCUCCUAC |  | UUUCCUCUAUAGUUCUCCUACCUAAGC |
| PTENC-S51UU | ACAAUCAUGUUGCAGCAAUUC | PTEND-S51UU | PACAAUCAUGUUGCAGCAAUUCACUG |
|  | ACUGUUAGUACAACGUCGUUA |  | ACUGUUAGUACAACGUCGUUAAGUGAC |
| PTENC-S52UU | UGAAACUAUUCCAAUGUUCAG | PTEND-S52UU | PUGAAACUAUUCCAAUGUUCAGUGGC |
|  | AAACUUUGAUAAGGUUACAAG |  | AAACUUUGAUAAGGUUACAAGUCACCG |
| PTENC-S53UU | UCUUGACCAAUGGCUAAGUGA | PTEND-S53UU | PUCUUGACCAAUGGCUAAGUGAAGAU |
|  | CUAGAACUGGUUACCGAUUCA |  | CUAGAACUGGUUACCGAUUCACUUCUA |
| PTENC-S54UU | AAGUAGAGUUCUUCCACAAAC | PTEND-S54UU | PAAGUAGAGUUCUUCCACAAACAGAA |
|  | GUUUCAUCUCAAGAAGGUGUU |  | GUUUCAUCUCAAGAAGGUGUUUGUCUU |
| PTENC-S55UU | CAUUAUAGAUAUUCUGACACC | PTEND-S55UU | PCAUUAUAGAUAUUCUGACACCACUG |
|  | UAGUAAUAUCUAUAAGACUGU |  | UAGUAAUAUCUAUAAGACUGUGGUGAC |
| PTENC-S56UU | UUAGUGACAAUGAACCUGAUC | PTEND-S56UU | PUUAGUGACAAUGAACCUGAUCAUUA |
|  | ACAAUCACUGUUACUUGGACU |  | ACAAUCACUGUUACUUGGACUAGUAAU |
| PTENC-S57UU | AUCAUUAUAGAUAUUCUGACA | PTEND-S57UU | PAUCAUUAUAGAUAUUCUGACACCAC |
|  | ACUAGUAAUAUCUAUAAGACU |  | ACUAGUAAUAUCUAUAAGACUGUGGUG |
| PTENC-S58UU | UAUUCCAAUGUUCAGUGGCGG | PTEND-S58UU | PUAUUCCAAUGUUCAGUGGCGGAACU |
|  | UGAUAAGGUUACAAGUCACCG |  | UGAUAAGGUUACAAGUCACCGCCUUGA |
| PTENC-S59UU | CAGAGGCUAGCAGUUCAACUU | PTEND-S59UU | PCAGAGGCUAGCAGUUCAACUUCUGU |
|  | AGGUCUCCGAUCGUCAAGUUG |  | AGGUCUCCGAUCGUCAAGUUGAAGACA |
| PTENC-S60UU | AAGGAGAUAUCAAGAGGAUGG | PTEND-S60UU | PAAGGAGAUAUCAAGAGGAUGGAUUC |
|  | UUUUCCUCUAUAGUUCUCCUA |  | UUUUCCUCUAUAGUUCUCCUACCUAAG |
| PTENC-S61UU | ACAAUGAACCUGAUCAUUAUA | PTEND-S61UU | PACAAUGAACCUGAUCAUUAUAGAUA |
|  | ACUGUUACUUGGACUAGUAAU |  | ACUGUUACUUGGACUAGUAAUAUCUAU |
| PTENC-S62UU | GAUCGUUAGCAGAAACAAAAG | PTEND-S62UU | PGAUCGUUAGCAGAAACAAAAGGAGA |
|  | CUCUAGCAAUCGUCUUUGUUU |  | CUCUAGCAAUCGUCUUUGUUUUCCUCU |
| PTENC-S63UU | ACUAUUCCAAUGUUCAGUGGC | PTEND-S63UU | PACUAUUCCAAUGUUCAGUGGCGGAA |
|  | UUUGAUAAGGUUACAAGUCAC |  | UUUGAUAAGGUUACAAGUCACCGCCUU |
