# Supplementary material
Source: HighWire-hosted journal article supplement (doi:10.1101/rna.031120.111)
Supplement: Table_S3.docx [file Table_S3.docx]

**Table S3**

| **Top PTEN-targeting Duplexes**  **(Not Sequence-matched)** | | | | **Top FVII-targeting Duplexes**  **(Not Sequence-matched)** | | | |
| --- | --- | --- | --- | --- | --- | --- | --- |
| **siRNA** | | **DsiRNA** | | **siRNA** | | **DsiRNA** | |
| **ID** | **IC50 (nM)** | **ID** | **IC50 (nM)** | **ID** | **IC50 (nM)** | **ID** | **IC50 (nM)** |
| PTENC-S49UU | 0.004 | PTEND-S49UU | 0.004 | FVIIC-S25UU | 0.004 | FVIID-S42UU | 0.006 |
| PTENC-S36UU | 0.008 | PTEND-S31UU | 0.004 | FVIIC-S14UU | 0.004 | FVIID-S52UU | 0.007 |
| PTENC-S15UU | 0.008 | PTEND-S36UU | 0.006 | FVIIC-S41UU | 0.005 | FVIID-S67UU | 0.009 |
| PTENC-S39UU | 0.010 | PTEND-S28UU | 0.006 | FVIIC-S53UU | 0.006 | FVIID-S20UU | 0.010 |
| PTENC-S14UU | 0.011 | PTEND-S33UU | 0.007 | FVIIC-S20UU | 0.006 | FVIID-S27UU | 0.010 |
| PTENC-S35UU | 0.014 | PTEND-S24UU | 0.008 | FVIIC-S21UU | 0.006 | FVIID-S24UU | 0.011 |
| PTENC-S28UU | 0.017 | PTEND-S20UU | 0.008 | FVIIC-S19UU | 0.009 | FVIID-S34UU | 0.012 |
| PTENC-S51UU | 0.018 | PTEND-S25UU | 0.008 | FVIIC-S10UU | 0.011 | FVIID-S43UU | 0.012 |
| PTENC-S62UU | 0.021 | PTEND-S13UU | 0.009 | FVIIC-S67UU | 0.011 | FVIID-S41UU | 0.015 |
| PTENC-S54UU | 0.024 | PTEND-S52UU | 0.009 | FVIIC-S27UU | 0.013 | FVIID-S10UU | 0.016 |

Table S3: IC50 values from top-performing duplexes. Note that sequences are not matched.
